1  
2  
3  
4  
5  
6  
7  
8  
9  
10  
11  
12  
13  
14  
15  
16  
17  
18  
19  
20  
21  
22  
23

**Autoreactive T cells preferentially drive differentiation of non-responsive memory B cells  
at the expense of germinal center maintenance.**

Rajiv W Jain<sup>1</sup>, Kate A Parham<sup>1</sup>, Yodit Tesfagiorgis<sup>1</sup>, Heather C Craig<sup>1</sup>, Emiliano Romanchik<sup>1</sup>,  
and Steven M Kerfoot<sup>1\*</sup>.

<sup>1</sup> Department of Microbiology and Immunology  
University of Western Ontario,  
London, Ontario, Canada

\* Corresponding Author:  
mail: Dr. Steve Kerfoot, University of Western Ontario, Dental Sciences Building 3014, London,  
Ontario, Canada, N6A 5C1  
email: [skerfoot@uwo.ca](mailto:skerfoot@uwo.ca)  
phone: 519 850 2329  
fax: 519 661 3499

24 **Abstract:**

25

26 B cell fate decisions within a germinal center (GC) are critical to determining the  
27 outcome of the immune response to a given antigen. Here, we characterize GC kinetics and B  
28 cell fate choices in a response to the autoantigen myelin oligodendrocyte glycoprotein (MOG),  
29 and compare them the response to a standard model foreign antigen (NP-haptenated ovalbumin,  
30 NPOVA). Both antigens generated productive primary responses, as evidenced by GC  
31 development, circulating antigen-specific antibodies, and differentiation of memory B cells.  
32 However, in the MOG response the status of the cognate T cell partner drove preferential B cell  
33 differentiation to a memory phenotype at the expense of GC maintenance, resulting in a  
34 truncated GC. Reduced plasma cell differentiation was largely independent of T cell influence.  
35 Interestingly, memory B cells formed in the MOG GC were unresponsive to secondary challenge  
36 and this could not be overcome with T cell help.

37

38

39 Keywords: B cell, T follicular helper cell, autoimmunity, germinal center, MOG, memory B cell,  
40 plasma cell, Multiple Sclerosis

41 **Introduction:**

42 Tailoring the immune response to a given antigen is a crucial function of the immune system, as  
43 the quality and nature of the response impacts the success of pathogen clearance as well as  
44 subsequent long-lived immunity. This is further complicated in cases where the response directly  
45 targets or cross reacts with a self-antigen. Nearly all immune responses incorporate both B and T  
46 cell recognition of the antigen, and collaboration between B and T cells specific for said antigen  
47 produces a germinal center (GC) response (Shlomchik and Weisel, 2012; Victora and  
48 Nussenzweig, 2012; Vinuesa et al., 2016). Throughout the GC response, B cell survival,  
49 proliferation, and differentiation to either antibody-producing plasma cells or memory B cells is  
50 dependent upon, and informed by, direct interactions with T cells specific for the same antigen  
51 (cognate interactions) (Mesin et al., 2016) . However, the signals that drive differential fate  
52 choices made by B cells responding to different antigens and how they are influenced by features  
53 of the antigen itself are not well understood.

54  
55 Interactions with cognate T cells are critical during two distinct phases of the developing B cell  
56 response. The first phase occurs shortly after exposure to a new antigen, but prior to GC  
57 formation. During this phase, cognate B/T interactions are essential to initiate antigen-stimulated  
58 B cell proliferation and also to drive B cell differentiation along three distinct pathways; short-  
59 lived plasmablasts that produce low affinity, largely IgM antibodies; early (mostly) IgM memory  
60 B cells; and GC B cells that reenter the follicle to initiate a new GC (Corcoran and Tarlinton,  
61 2016). The second phase is within the mature GC itself. GC B cells undergo clonal expansion  
62 and somatic hypermutation largely within the dark zone (DZ), before migrating to the light zone  
63 (LZ) to compete for survival signals supplied through interactions with specialized cognate T

64 follicular helper (Tfh) cells (Mesin et al., 2016). Evidence also suggests that Tfh cells provide  
65 signals that, in addition to maintaining the GC by selecting GC B cells for survival and  
66 additional rounds of proliferation and mutation in the DZ, again influence GC B cell  
67 differentiation into memory B cells or plasma cells. GC-derived plasma cells and long-lived  
68 plasma cells produce the high affinity, class switched antibodies critical to pathogen clearance  
69 and long-term immunity; while different subpopulations of GC-derived memory B cells are able  
70 to rapidly differentiate into plasma cells or re-initiate the GC upon re-exposure to antigen.

71  
72 Several Tfh-derived signals have been identified that can, through genetic deletion or antibody  
73 blockade, influence B cell differentiation. These include the cytokines IL-4 and IL-21  
74 (Linterman et al., 2010; Weinstein et al., 2016) and receptors PD-1 and ICOS (Good-Jacobson et  
75 al., 2010; Liu et al., 2015). It is possible that differential expression of these factors is the  
76 mechanism by which the immune system tailors the B cell response to different antigens, but this  
77 has not been explored. BCR affinity for antigen is known to influence B cell fate choice, with  
78 higher affinity being linked to preferential plasma cell differentiation (Paus et al., 2006), but how  
79 or if an antigen can influence the cognate T cell partner or the signal it provides to B cells is not  
80 known.

81  
82 Recent advances in understanding GC development and the cognate B/T interactions that drive  
83 them have benefited from model antigen systems in which B and T cells specific for the antigen  
84 can be identified and their activation and differentiation tracked over the course of the response.  
85 For example, we and others have transferred fluorescent ovalbumin (OVA)-specific T cells  
86 isolated from OTII mice and nitrophenyl hapten (NP)-specific B cells from B1-8 mice to non-

87 fluorescent mice to track both cell types in the developing GC following immunization with NP-  
88 haptened OVA (NPOVA) (Kerfoot et al., 2011; Shulman et al., 2014). Similar models based on  
89 other, almost always foreign antigens produce very similar outcomes. A model system based on  
90 an autoantigen may provide a tool with which to dissect the mechanisms by which the immune  
91 system itself controls differential outcomes, without relying on external blockade or deletion of  
92 candidate factors, yet the development of the autoimmune GC is under explored.

93

94 Myelin oligodendrocyte glycoprotein (MOG) is a well characterized autoantigen associated with  
95 anti-myelin autoimmunity of the central nervous system, both in human multiple sclerosis (MS)  
96 and the well-characterized animal model experimental autoimmune encephalomyelitis (EAE). In  
97 MS, anti-myelin B cells and antibodies show evidence of somatic hypermutation, indicating that  
98 they are GC-derived (Stern et al., 2014; von Büdingen et al., 2012). Currently, the most common  
99 way to induce MOG autoimmunity in C57Bl/6 mice is to immunize with the MOG<sub>35-55</sub> peptide  
100 that corresponds to the CD4<sup>+</sup> T cell epitope, a method that excludes B cell targeting of the MOG  
101 protein (Dang et al., 2015). However, we have shown that immunization with a larger peptide  
102 corresponding with the MOG-extracellular domain does indeed result in GC development  
103 incorporating anti-MOG B cells (Dang et al., 2015; Tesfagiorgis et al., 2017). Therefore, we  
104 assembled and developed the tools necessary to generate a MOG-based model antigen system  
105 analogous to the NPOVA system described above for investigation of differential B cell fate  
106 choice under the control of notably different antigens.

107

108 Here, we demonstrate that the GC develops very differently in response to MOG compared to the  
109 well characterized NPOVA system. In comparison to the NPOVA response, B cell fate choice in

110 the MOG GC response was heavily biased against plasma cells. Further, while the MOG GC  
111 developed normally, it was not sustained and instead collapsed early, producing a large number  
112 of memory-phenotype cells. By manipulating the T cell pairing, we determined that, while  
113 plasma cell differentiation was largely independent of T cell influence, while class switch, GC  
114 maintenance, and differentiation into memory-phenotype cells were largely under the control of  
115 the T cell partner. By manipulating the antigen itself, we for the first time found the T cell  
116 affinity for antigen impacts B cell fate choice. Finally, we determined that memory phenotype  
117 cells derived from the MOG GC are not responsive to secondary challenge, and that this is  
118 intrinsic to the B cell and not due to education by the autoimmune T cell. To the best of our  
119 knowledge, this is the first example of unresponsive B cells derived directly from the GC.

120 **Methods/Materials:**

121 Mice: C57Bl/6, 2D2 TCR-transgenic (Bettelli et al., 2003), SMARTA TCR-transgenic (4694;  
122 Tg(TcrLCMV)327Sdz/JDvsJ), and OTII TCR-transgenic mice (4194; Tg(TcraTcrb)425Cbn/J)  
123 were purchased from Jackson Laboratories, Bar Harbor, Maine. B1-8 mice (Maruyama et al.,  
124 2000) with a homozygous deletion of the J $\kappa$  locus (Chen et al., 1993) were a generous gift from  
125 Dr. Ann Haberman. IgH<sup>MOG</sup> MOG-specific BCR knockin mice (Litzenburger et al., 1998) were  
126 received as a gift from Dr. H Wekerle. Mice expressing fluorescent proteins within all nucleated  
127 cells, either dsRed (RFP; 6051; Tg(CAG-DsRedpMST)1Nagy/J) under control of the  $\beta$ -Actin  
128 promoter or eGFP via the ubiquitin promoter (4353; Tg(UBCGFP)30Scha/J) were obtained from  
129 the Jackson Laboratory. Mice were housed in a specific pathogen-free barrier at West Valley  
130 Barrier. All animal protocols (2011-047) were approved by the Western University Animal Use  
131 Subcommittee.

132  
133 Antibodies for histology/flow cytometry: The following antibodies were purchased from BD  
134 Biosciences, Franklin Lakes, New Jersey: anti-Bcl6 A647 or v450 (K112-91), anti-CD138  
135 BV421 or biotin (281-2), anti-CXCR5 APC (2G8), anti-CD19 BV711 (1D3), anti-CD4 v450  
136 (RM4-5), anti-CD62L A700 (Mel14), anti-CD95 PE-Cy7 (Jo2), anti-IgG1 APC (A85-1),  
137 Streptavidin v450 or APC-Cy7, and anti-CD80 PE (16-10A1). The following antibodies were  
138 purchased from Thermo Fisher Scientific, Waltham, Massachusetts: anti-BrdU A647 (MoBU-1),  
139 anti-IgM A568 (polyclonal), anti-CXCR4 PE (2B11), Streptavidin A568, anti-Ki67  
140 unconjugated. The following antibodies were purchased from eBioscience, Waltham,  
141 Massachusetts: anti-PD-1 biotin (RMP1-30), anti-CD38 PE or PE-Cy5 (90), anti-CD4 PE-Cy5  
142 (RM4-5), anti-FoxP3 eF660 (FJK-16s), anti-IgD eF450 (11-26c), anti-IgG1 PerCP-eF710 (M1-

143 14D12), Streptavidin APC, anti-ICOS biotin (C398.4A), and anti-PD-L2 biotin (TY25). The  
144 following antibodies were purchased from BioLegend, San Diego, California: anti-His Tag  
145 purified (J099B12), anti-PD-1 PE-Cy7 (RMP1-30), anti-rabbit IgG Dylight 649 (polyclonal),  
146 anti-CD4 A647 (RM4-5).

147

148 Cloning of haMOG<sub>tag</sub>: The pET-32 mMOG<sub>tag</sub> vector (Jain et al., 2016) was mutated by PCR  
149 using the following primers: 5'

150 TCTTCTTTTTCTCGCGTTTCTGGTTCTCCGTCTTCTGGTTTTGAAAACCTTGTATTTCCA

151 AGGACAGTTTCGCG 3' and the reverse primer 5'

152 GCGAGAAAAGAAGAACGGGTTTCGGTAACACGACGATATGCACCGGAGCCACCA

153 CCGGTAC 3'. The resulting vector was sequenced to confirm the insertion of the 13-35

154 neurofilament-M sequence and transformed into BL21 bacteria for expression.

155

156 MOG production and purification: mMOG<sub>tag</sub> and haMOG<sub>tag</sub> proteins were produced and purified  
157 as previously described (Jain et al., 2016). The final equimolar concentrations were 5 mg/mL for  
158 mMOG<sub>tag</sub> and 5.394 mg/mL for haMOG<sub>tag</sub> with no detectable impurities as determined by SDS-  
159 PAGE.

160

161 Adoptive transfer of B and T cells and immunization: Naïve antigen-specific T cells were  
162 isolated from RFP<sup>+</sup> 2D2 and OTII mice and naïve antigen-specific B cells were isolated from  
163 GFP<sup>+</sup> IgH<sup>MOG</sup> and B1-8 Jκ<sup>-/-</sup> mice as previously described (Kerfoot et al., 2011). Briefly, lymph  
164 nodes and spleens of RFP<sup>+</sup> antigen-specific T cell and GFP<sup>+</sup> antigen-specific B cell mice were  
165 dissociated and B and T cells were isolated using EasySep Negative selection Mouse B and T



166 cell Enrichment Kits (StemCell Technologies, Vancouver, Canada). Unless otherwise stated,  $5 \times$   
167  $10^5$  RFP<sup>+</sup> T cells and either  $1 \times 10^6$  GFP<sup>+</sup> B1-8 J $\kappa$ <sup>-/-</sup> or  $5 \times 10^6$  GFP<sup>+</sup> IgH<sup>MOG</sup> B cells (to account  
168 for the fact that only 20% are MOG-specific (Dang et al., 2015)) were transferred i.v into  
169 C57Bl/6 or SMARTA recipients 2 d prior to immunization. Mice were immunized in the footpad  
170 with equimolar amounts of the given antigen (125  $\mu$ g mMOG<sub>tag</sub>, 175  $\mu$ g NPOVA, 125  $\mu$ g  
171 NPMOG<sub>tag</sub> (both at a 1:25 protein:NP ratio), 135  $\mu$ g haMOG<sub>tag</sub>) in CFA. Unless otherwise stated,  
172 draining popliteal lymph nodes were harvested at the indicated time points for analysis. In  
173 experiments using BrdU, 1.5 mg of BrdU was injected i.p at the specified time points.

174

175 Flow cytometry: Draining popliteal lymph nodes were harvested from mice for FACS analysis as  
176 previously described (Dang et al., 2015). Briefly, lymph node cell suspensions were blocked  
177 with an anti-Fc $\gamma$  receptor, CD16/32 2.4G2 (BD biosciences), in PBS containing 2% FBS before  
178 further incubation with the indicated antibodies. Dead cells were excluded by staining with either  
179 the Fixable Viability Dye eFluor506 (eBioscience), propidium iodide (Thermoscientific), or 7-  
180 AAD (Biolegend). Flow cytometry was performed on a BD Immunocytometry Systems LSRII  
181 cytometer and analyzed with FlowJo software (Tree Star, Ashland, Oregon). For intracellular  
182 stains of FoxP3 or Bcl6, cells were fixed and permeabilized with Cytotfix / Cytoperm solution  
183 (BD Bioscience) after cell surface staining. Fixed cells were then intracellularly stained for Bcl6  
184 and FoxP3 at 4°C overnight. For BrdU staining, cells were fixed in 2% PFA then permeabilized  
185 in 0.1% Tween 20 for two nights at 4°C. The DNA within the fixed cells was degraded using  
186 DNase I (Sigma-Aldrich, St. Louis, Missouri) then stained with anti-BrdU antibody. Cell sorting  
187 was performed using a BD FACS ARIAIII where cells were sorted into 100% FBS.

188

189 Immunofluorescent histology: Tissues were prepared for histology as previously described  
190 (Dang et al., 2015). Briefly, whole popliteal lymph nodes were fixed in periodate–lysine–  
191 paraformaldehyde (PLP), subsequently passed through sucrose gradients to protect from freezing  
192 artifacts and then frozen in OCT (TissueTek, Torrance, California) media. Serial cryostat  
193 sections (7  $\mu$ m) were blocked in PBS containing 1% Bovine Serum Albumin, 0.1% Tween-20  
194 and 10% rat serum before proceeding with staining. Sections were mounted with ProLong Gold  
195 Antifade Reagent (Invitrogen, Carlsbad, California). Tiled images of whole lymph node sections  
196 (20 $\times$ ) were imaged using DM5500B fluorescence microscope (Leica, Wetzlar, Germany).

197  
198 T cell proliferation assay: RFP<sup>+</sup> OTII or 2D2 CD4<sup>+</sup> T cells were enriched through negative  
199 selection as described above. Splenocytes of wild type C57Bl/6 mice were depleted of red blood  
200 cells using ACK lysis buffer (Thermo Fisher Scientific). The cells were then transferred into  
201 10% FBS RPMI with L-glutamine (Thermo Fisher Scientific) supplemented with 1x  
202 penicillin/streptomycin (WISENT, Saint-Bruno, Canada). One million splenocytes were then  
203 added to individual wells of a sterile 48-well plate and were incubated with either 35  $\mu$ g NP-  
204 OVA, 25  $\mu$ g mMOG<sub>tag</sub>, or 27  $\mu$ g haMOG<sub>tag</sub> for one hour at 37 °C 5% CO<sub>2</sub>. OTII or 2D2 T cells  
205 were CFSE (Thermo Fisher Scientific) labelled as previously described (Jain et al., 2016) and 4 x  
206 10<sup>5</sup> T cells were added to the antigen loaded splenocytes. After three days of co-culture, CFSE  
207 labeling of antigen-specific T cells was analyzed by flow cytometry.

208  
209 Digital Droplet PCR (ddPCR): Tfh and naïve T cells were sorted by flow and RNA was  
210 extracted from cells using a RNeasy Plus Micro Kit (QIAGEN, Hilden, Germany) and  
211 immediately converted into cDNA using a Superscript VILO cDNA Synthesis Kit (Invitrogen).

212 ddPCR reactions were set up using ddPCR EvaGreen 2x Supermix (Bio-Rad, Hercules,  
213 California) and the following primers: IL-4 Sense – 5' AGATGGATGTGCCAAACGTCCTCA  
214 3', IL-4 Antisense – 5' AATATGCGAAGCACCTTGGAAGCC 3', IL-10 Sense – 5'  
215 GGTTGCCAAGCCTTATCGGA 3', IL-10 Antisense – 5' ACCTGCTCCACTGCCTTGCT 3',  
216 IL-21 Sense – 5' TGAAAGCCTGTGGAAGTGCAAACC 3', IL-21 Antisense – 5'  
217 AGCAGATTCATCACAGGACACCCA 3', CD40L Sense – 5'  
218 GTGAGGAGATGAGAAGGCAA 3', CD40L Antisense – 5' CACTGTAGAACGGATGCTGC  
219 3', ICOS Sense – 5' TGACCCACCTCCTTTTCAAG 3', ICOS Antisense – 5'  
220 TTAGGGTCATGCACACTGGA 3', PD-1 Sense – 5' CGTCCCTCAGTCAAGAGGAG 3', PD-  
221 1 Antisense – 5' GTCCCTAGAAGTGCCCAACA 3', CD28 Sense – 5'  
222 TGACACTCAGGCTGCTGTTC 3', CD28 Antisense – 5' TTCCTTTGCGAGAAGGTTGT 3',  
223 CTLA4 Sense – 5' GCTTCCTAGATTACCCCTTCTGC 3', CTLA4 Antisense – 5'  
224 CGGGCATGGTTCTGGATCA 3', FoxP3 Sense – 5' CCCAGGAAAGACAGCAACCTT 3',  
225 FoxP3 Antisense – 5' TTCTCACAACCAGGCCACTTG 3'. ddPCR reactions were run on a  
226 QX200 Droplet Digital PCR System (Bio-Rad) and analyzed using QuantaSoft software (Bio-  
227 Rad). Gene expression was normalized to the number of sorted cells and expressed as mRNA  
228 copies per cell.

229  
230 ELISpots and ELISA: 96-well plates were coated overnight at 4°C with 0.5 µg NPOVA,  
231 NPMOG<sub>tag</sub>, or mMOG<sub>tag</sub>. Wells were blocked with 1% (wt/vol) BSA in PBS, then incubated  
232 with serial diluted bone marrow or lymph node cells at 37°C in 5% CO<sub>2</sub>. Spots were detected  
233 using a goat alkaline phosphatase-conjugated anti-mouse IgM or IgG antibody (MABTECH,  
234 Nacka Strand, Sweden) and 5-bromo-4-chloro-3-indolyl-phosphate substrate (Sigma-Aldrich)

235 and counted under a Leica M80 dissection microscope. To detect circulating antibodies using an  
236 ELISA, 96-well plates were incubated with antigen and blocked with BSA as written above.  
237 Blood was extracted from mice using a cardiac puncture and spun at 4500 x g for 15 minutes.  
238 Serum plasma was extracted and incubated with the 96-well plate for one hour at room  
239 temperature. Plates were incubated with anti-IgM or IgG antibodies and then the alkaline  
240 phosphatase yellow (pNPP; Sigma-Aldrich) substrate. OD405 was measured using an Eon  
241 microplate spectrophotometer (BioTek, Winooski, Vermont).

242

243 Image and statistical analyses: Histology images were analyzed using ImageJ software to  
244 quantify the density of B and T cells in germinal centers (Bcl6<sup>+</sup> IgD<sup>-</sup>) and B cell follicles (IgD<sup>+</sup>  
245 cells excluding five cells deep worth of the outermost perimeter of the B cell follicle near the  
246 capsule). PRISM software (GraphPad Software, La Jolla, California) was used to analyze FACs  
247 and histology data. For statistical comparisons, a students T-test was used for single comparisons  
248 and a one-way ANOVA followed by a T test with Bonferroni correction was used for multiple  
249 comparisons.

250 **Results:**

251 **Immunization with MOG autoantigen results in an atypical, unsustained GC response:**

252 In order to identify and track responding B and T cells throughout an immune response to two  
253 different antigens, GFP<sup>+</sup> B cells (either NP-specific B1-8<sup>+</sup> Jκ<sup>-/-</sup> or MOG-specific IgH<sup>MOG</sup>) and  
254 RFP<sup>+</sup> T cells (either OVA-specific OTII or MOG-specific 2D2) were isolated from mutant mice  
255 and transferred into wild type C57BL/6, non-fluorescent recipients (Figure 1A). Two days post  
256 transfer, mice were immunized in the footpad with the appropriate antigen (NPOVA for  
257 recipients of B1-8 B cells and OTII T cells, or mMOG<sub>tag</sub> for recipients of IgH<sup>MOG</sup> B cells and  
258 2D2 T cells) in CFA. Lymph nodes were harvested for histological analysis 5d post  
259 immunization, representing the outcomes of early, pre-GC cognate interactions between  
260 responding B and T cells, or 10d post immunization, representing a mature GC time point.

261  
262 While virtually no transferred fluorescent cells could be observed in lymph nodes from  
263 unimmunized mice (Not Shown), large numbers of fluorescent B and T cells derived from the  
264 original transferred populations were readily evident at the 5d time point in both antigen systems  
265 (Figure 1B top, C). Consistent with our previous observations (Kerfoot et al., 2011) PD-1<sup>+</sup> RFP<sup>+</sup>  
266 Tfh cells were distributed throughout the follicle and GC in both model systems, although the  
267 density of RFP<sup>+</sup> T cells was significantly lower in mMOG<sub>tag</sub>-immunized mice (Figure 1B, C, E).

268  
269 Very large numbers of GFP<sup>+</sup> CD138<sup>+</sup> cells, representing the early short-lived plasmablast  
270 response, were evident outside of the follicles and within medullary cords of NPOVA- but not  
271 mMOG<sub>tag</sub>-immunized mice (Figure 1D). By 10d post immunization fewer, but equivalent  
272 numbers of plasma cells were within medullary cords in both model systems.

273  
274 Within B cell follicles, dense clusters of GFP<sup>+</sup> cells (Figure 1B, C) that were also IgD<sup>lo</sup>, Ki67<sup>+</sup>,  
275 and Bcl-6<sup>+</sup> (Figure 1A, E) were evident in both systems 5d post immunization, indicating that  
276 early pre-GC B/T interactions were sufficient to drive GC B cell differentiation and  
277 establishment of a new GC. However, by 10d post immunization, the GC in the MOG antigen  
278 system had largely disappeared, while this time point corresponded with the full development of  
279 a mature and organized GC in the NPOVA system (Figure 1B bottom, C). Small clusters of  
280 Ki67<sup>+</sup> and Bcl-6<sup>+</sup> cells could still be observed in follicles of mMOG<sub>tag</sub>-immunized mice,  
281 however these were much smaller and less dense than those observed in NPOVA mice (Figure  
282 1E). Instead, greater numbers of individual GFP<sup>+</sup> cells were scattered throughout the follicle  
283 (Figure 1B, C). Very few individual GFP<sup>+</sup> cells were evident in the follicle in the NP-OVA  
284 system, and virtually all remained confined in the GC.

285

286 **Preferential differentiation of B cells with a memory phenotype in response to MOG**  
287 **autoantigen:**

288 The developing GC response was analyzed by FACS in a separate, identical experiment.  
289 Consistent with our histological observations, the early CD19<sup>int</sup> CD138<sup>+</sup> plasma cell response  
290 was nearly absent in mMOG<sub>tag</sub>-immunized mice compared to a very large response in the  
291 NPOVA system (Figure 2A, B). This was true of both the GFP<sup>+</sup> response derived from  
292 transferred, antigen specific B cells and the endogenous GFP<sup>-</sup> response (Figure 2B bottom),  
293 confirming that this is a feature of the anti-MOG response.

294

295 While antigen-specific GFP<sup>+</sup> CD95<sup>hi</sup> CD38<sup>lo</sup> GC B cells were evident in both the NPOVA and  
296 MOG systems at the d5 time point, they made up a significantly smaller proportion of the total  
297 GFP<sup>+</sup> B cell population in the MOG system (Figure 2A, B), and most dramatically at the 10d  
298 time point, consistent with the collapse of the GC response observed by histology. A similar  
299 collapse of the endogenous, GFP<sup>-</sup> GC was also observed in mMOG<sub>tag</sub> immunized mice (Figure  
300 2B bottom). The proportional loss of GFP<sup>+</sup> antigen-specific GC B cells and plasma cells in the  
301 MOG response was offset by a large increase in the proportion of CD38<sup>hi</sup> CD95<sup>lo</sup> cells, a  
302 phenotype shared by naïve and memory B cells (Figure 2B, top right).

303  
304 Evaluation of class switch in the GC B cell population 8d post immunization, prior to complete  
305 collapse of the MOG GC, revealed that the ratio of IgG1 to IgM-expressing GC B cells was  
306 significantly higher in NPOVA-immunized mice (Figure 2C). Nevertheless, and despite the bias  
307 against plasma cell development (Figure 2A, B), mMOG<sub>tag</sub>-immunized mice were still capable of  
308 mounting an antigen-specific antibody response, albeit smaller than the response observed in  
309 response to NPOVA. Indeed, by ELISpot the number of anti-MOG IgM and IgG producing cells  
310 was significantly lower in lymph nodes 14d post immunization compared to anti-NP producing  
311 cells (Figure 2D top). Similar analysis of bone marrow revealed a reduction in anti-MOG IgM,  
312 but not IgG-producing cells (Figure 2D middle). This was reflected by reduced levels of  
313 circulating anti-MOG compared to anti-NP IgM but not IgG, as measured by ELISA of serum  
314 from the same mice (Figure 2D bottom).

315

316

317

318 **Antigen-specific GFP<sup>+</sup> CD38<sup>hi</sup> CD95<sup>lo</sup> B cells are antigen experienced:**

319 To confirm that the GFP<sup>+</sup> CD38<sup>hi</sup> CD95<sup>lo</sup> B cells observed above derive from previously  
320 activated and proliferating cells, BrdU was injected 4, 5, and 6d post immunization to label  
321 proliferating cells. On day 10-post immunization, lymph nodes were harvested for FACS  
322 analysis. In this way, only cells that were actively proliferating during the labeling period (note  
323 that only a proportion of actively proliferating cells would be labeled, due to the short half-life of  
324 free BrdU in mice), but had then become quiescent would retain BrdU labeling (Weisel et al.,  
325 2016). Indeed, neither non-proliferating endogenous GFP<sup>-</sup> CD38<sup>hi</sup> CD95<sup>lo</sup> follicular B cells  
326 (Figure 2E), nor proliferative GFP<sup>+</sup> CD95<sup>hi</sup> CD38<sup>lo</sup> GC B cells (not shown) stained with BrdU.  
327 In contrast, a proportion of GFP<sup>+</sup> CD38<sup>hi</sup> CD95<sup>lo</sup> memory/naïve B cells were BrdU<sup>+</sup> in both  
328 model systems, confirming that they derived from previously activated cells.

329  
330 Combined, our histology and FACS findings demonstrate that, compared to a standard well-  
331 studied model foreign antigen, the B cell response to MOG protein produces a short-lived GC  
332 response with relatively little class switch and reduced plasma cell differentiation. Instead, the  
333 GC response dissolves early to produce a large number of memory-phenotype, non-proliferating  
334 cells distributed throughout the follicle.

335

336 **T cells partially control the outcome of the GC response to MOG:**

337 To begin to decipher the role for the cognate T cell partner in instructing differential B cell fate  
338 choice and the failure of GC maintenance in the MOG vs NPOVA systems, we took advantage  
339 of the modular nature of the hapten antigen system to place NP-specific B1-8<sup>+</sup> Jκ<sup>-/-</sup> B cells under  
340 control of either OVA-specific OTII T cells (NPOVA) or MOG-specific 2D2 T cells (NPMOG).



341 Fluorescent NP-specific B cells were transferred to non-fluorescent recipients expressing an  
342 irrelevant transgenic TCR (SMARTA) in order to limit the endogenous T cell response. Either  
343 OVA or MOG-specific T cells were transferred at the same time. Recipients were immunized 2d  
344 later with the appropriate antigen and lymph nodes were harvested 5 or 10d post immunization  
345 for analysis by FACS or, in a separate experiment, histology.

346  
347 Similar to the response to MOG observed above (Figure 2B), 5d post immunization short-lived  
348 plasmablasts made up a smaller proportion of the NP-specific GFP<sup>+</sup> response under control of  
349 MOG-specific T cells compared to OVA specific T cells (Figure 3A) although the difference was  
350 not as extreme and, unlike in the response to MOG, plasma cell numbers had fully recovered by  
351 d10. A large GC was evident 5d post-immunization by FACS (Figure 3A) and histology (Figure  
352 3B, C) in both systems, indicating that OVA and MOG-specific T cells are capable of supporting  
353 the early formation of a GC. However, by 10d post immunization there was evidence that the  
354 NPMOG GC had begun to collapse, as GC B cells made up a smaller proportion of the total  
355 antigen-specific population compared to the NPOVA response (Figure 3A), and GCs were less  
356 dense (Figure 3B, C). This was balanced by a significant increase in the proportion of antigen-  
357 specific B cells with a memory/naïve CD38<sup>hi</sup> CD95<sup>lo</sup> phenotype (Figure 3A). Further, class  
358 switch on GC B cells was also significantly reduced under the control of MOG-specific T cells  
359 (Figure 3D). Therefore, ongoing maintenance rather than initiation of the GC, as well as class  
360 switch, are in part controlled by the T cell partner of the cognate B/T pairing.

361

362

363

364 **Low T cell antigen affinity limits the MOG GC response:**

365 A common feature of autoimmune TCRs, including TCRs that recognize the MOG<sub>35-55</sub> peptide,  
366 is that they tend to bind peptide:MHC with relatively low affinity (Deng and Mariuzza, 2007;  
367 Ramadan et al., 2016). Many are also polyreactive – meaning that they recognize more than one  
368 specific peptide. Indeed, analysis of the MOG<sub>35-55</sub>-specific 2D2 TCR revealed that it also  
369 recognizes a second peptide derived from the Neurofilament-M protein (NF-M<sub>18-30</sub>)  
370 (Krishnamoorthy et al., 2009), and in fact binds NF-M<sub>18-30</sub> with higher affinity than it does  
371 MOG<sub>35-55</sub> (Rosenthal et al., 2012). We took advantage of polyreactivity of the 2D2 TCR to  
372 determine if TCR affinity for antigen influences B cell fate choice and maintenance of the GC  
373 response by generating a modified mMOG<sub>tag</sub> antigen that incorporates the NF-M<sub>18-30</sub> epitope  
374 (Figure 4A – referred to as “high affinity” or haMOG<sub>tag</sub>). Initial validation experiments were  
375 performed to confirm processing and presentation of haMOG<sub>tag</sub> to T cells. Isolated, CFSE-  
376 labeled OTII or 2D2 T cells were cultured with splenocytes loaded with NPOVA, mMOG<sub>tag</sub>, or  
377 haMOG<sub>tag</sub>. 2D2 T cell proliferation to haMOG<sub>tag</sub> was intermediate, between that of OTII cells in  
378 response to NPOVA and 2D2 cells in response to mMOG<sub>tag</sub> (Figure 4B).

379

380 Having validated the haMOG<sub>tag</sub> antigen, fluorescent MOG-specific B and T cells were  
381 transferred to SMARTA recipients which were then immunized with either mMOG<sub>tag</sub> or  
382 haMOG<sub>tag</sub>. Lymph nodes were harvested 5 or 10d later for analysis by FACS. Greater numbers  
383 of RFP<sup>+</sup> 2D2 T cells were recovered from haMOG<sub>tag</sub> immunized compared to MOG<sub>tag</sub>  
384 immunized mice (Figure 4C), confirming that, as in our *in vitro* assay, haMOG<sub>tag</sub> induces greater  
385 T cell proliferation *in vivo*. No differences in plasma cell differentiation were observed at either  
386 time point (Figure 4D). However, consistent with the hypothesis that the TCR affinity of the T

387 cell partner in the cognate pair influences GC maintenance vs B cell differentiation, partial  
388 recovery of the GC with a corresponding decrease in the proportion of memory-phenotype B  
389 cells was observed 10d post immunization with haMOG<sub>tag</sub>. In contrast to our observations where  
390 NP-specific B cells were placed under control of two different T cells (Figure 3), T cells  
391 responding to haMOG<sub>tag</sub> did not affect class switch in the GC (Figure 4E), suggesting that these  
392 outcomes are controlled separately or that they represent a gradient of potential outcomes  
393 influenced by different levels of T cell activation and signal production.

394

395 In the cyclic reentry model of the GC response (Victora and Nussenzweig, 2012), GC B cells  
396 undergo repeated rounds of proliferation and somatic hypermutation, largely in the dark zone  
397 (DZ), followed by migration to the light zone (LZ) to receive survival and differentiation signals,  
398 predominantly from Tfh cells. We hypothesized that the collapse of the MOG GC was due to the  
399 inability of Tfh cells to drive LZ B cells to maintain GC status and reenter the DZ, instead  
400 resulting in differentiation to a memory phenotype. To test this, proliferation of GC B cells was  
401 analyzed by BrdU uptake, along with the expression of CXCR4 as a marker of DZ GC B cells.  
402 Consistent with our hypothesis, BrdU labeling of GC B cells was significantly higher in the  
403 NPOVA system compared to either the mMOG<sub>tag</sub> or haMOG<sub>tag</sub>-immunized mice, and more GC  
404 B cells were of the CXCR4<sup>+</sup> DZ phenotype, while haMOG<sub>tag</sub>-induced GCs were intermediate  
405 (Figure 4F).

406

407

408

409 **Levels of T cell activation do not explain the differential B cell response between the**  
410 **different model systems:**

411 In an attempt to understand the underlying mechanism behind the differential outcome of the GC  
412 response in the different model antigen systems, antigen-specific Tfh cells (CXCR5<sup>+</sup> PD-1<sup>hi</sup>  
413 RFP<sup>+</sup>) were FACS sorted from lymph nodes of mice 10d post immunization with NPOVA,  
414 mMOG<sub>tag</sub>, or haMOG<sub>tag</sub> (Figure 5A, B). mRNA was isolated for quantitative digital droplet PCR  
415 analysis of the expression of proteins with a known role in providing T cell help and  
416 differentiation signals to GC B cells. Surprisingly, little difference was observed in expression  
417 levels of the canonical Tfh cytokines IL-4 and IL-21 (the small difference in IL-4 expression was  
418 not consistent across experiments) nor the expression of IL-10 (Figure 5C, top). Neither were  
419 their differences in the expression of the surface receptors CD40L, ICOS, PD-1, CD28 and  
420 CTLA-4 (Figure 5C, middle). Equivalent surface expression of ICOS and PD-1 by antigen-  
421 specific Tfh cells was confirmed in a separate experiment by FACS (Figure 5D). Interestingly,  
422 the master regulator of regulatory T cells, FoxP3, was expressed at significantly higher levels by  
423 Tfh cells from haMOG<sub>tag</sub>-immunized mice (Figure 5C bottom), a finding confirmed by FACS  
424 (Figure 5D). The significance of this observation is not clear, as an increased ratio of T follicular  
425 regulatory cells would seem to counter the larger GC response in haMOG<sub>tag</sub> vs MOG<sub>tag</sub>-  
426 immunized mice. Nevertheless, this finding was consistent across three separate ddPCR and  
427 FACS experiments.

428

429 We consistently observed that the absolute number of Tfh cells was greater in the NPOVA vs  
430 MOG systems (Figure 5B, and also reflected in Figure 1C) and that haMOG<sub>tag</sub> immunization  
431 produced intermediate numbers of Tfh cells (Figure 5B, and also reflected in Figure 4C). This

432 resulted in the GC B cell:Tfh cell ratio remaining the same across model antigen systems (one  
433 example presented in Figure 5E). To determine if the size of the GC response was simply linked  
434 to the size of the T cell response to a given antigen, different numbers of 2D2 T cells were  
435 transferred along with equal numbers of MOG-specific B cells into SMARTA recipient mice.  
436 While immunization with mMOG<sub>tag</sub> resulted in a significantly larger antigen-specific T cell  
437 response in mice that received more cells, there was no similar increase in the number of Tfh  
438 cells, nor was there an alteration in the GC response (Figure 5F).

439

#### 440 **MOG-induced memory B cells are not responsive to secondary challenge:**

441 The primary function of memory B cells is to respond to secondary immune challenge (Weisel  
442 and Shlomchik, 2017). To determine if CD38<sup>hi</sup> CD95<sup>lo</sup> memory phenotype B cells generated  
443 from the MOG GC are responsive to antigen challenge, we performed an experiment that isolates  
444 the primary and secondary responses within the same mouse (Figure 6A). After transfer of  
445 fluorescent, antigen-specific B and T cells, SMARTA recipients were immunized in the left  
446 footpad only and 34d later, the same mice were immunized in the right footpad. Left and right  
447 draining lymph nodes were analyzed separately by FACS 5d post secondary challenge. Control  
448 mice immunized with NPOVA in CFA in the left footpad but “challenged” with adjuvant alone  
449 showed an ongoing (but small in absolute terms – data not shown) GFP<sup>+</sup> GC response in the left  
450 but not right draining lymph nodes (Figure 6B middle), confirming the lymphatic separation of  
451 the two sides. As expected, memory phenotype cells made up the vast majority of GFP<sup>+</sup> cells on  
452 the right side, confirming that memory cells generated in the primary GC properly circulate and  
453 home to lymphatic tissues (Figure 6B bottom). As expected, secondary challenge with NPOVA  
454 resulted in generation of short lived plasmablasts (Figure 6B top) and initiation of a GC response

455 on the right, but not the left side. This contrasted starkly with the challenge response in  
456 mMOG<sub>tag</sub>-immunized mice. Consistent with previous observations, the primary GC response on  
457 the left side in mMOG<sub>tag</sub>-immunized mice had disappeared, along with evidence of plasma cells  
458 at the 39d time point, leaving GFP<sup>+</sup> cells with exclusively a CD38<sup>hi</sup> CD95<sup>lo</sup> phenotype. Despite  
459 the clear presence of memory-phenotype GFP<sup>+</sup> cells in the right lymph node, secondary  
460 challenge with mMOG<sub>tag</sub> antigen did not produce a new GC response or plasma cells.

461  
462 Recently, subsets of memory B cells have been identified based on differential expression of PD-  
463 L2 and CD80 (Tomayko et al., 2010). Double negative memory cells are associated with the  
464 establishment of a new GC (Zuccarino-Catania et al., 2014). Nevertheless, CD38<sup>hi</sup> CD95<sup>lo</sup> GFP<sup>+</sup>  
465 B cells in mMOG<sub>tag</sub>-immunized mice were almost entirely double negative, while a significant  
466 proportion of memory cells in NPOVA immunized mice expressed PD-L2 and/or CD80 (Figure  
467 6C). Class switch remained reduced on GFP<sup>+</sup> memory cells in the MOG system compared to the  
468 NPOVA system (Figure 6D), and significantly fewer IgG-producing long-lived plasma cells  
469 were recovered from the bone marrow (Figure 6E).

470  
471 In the above experiment, it is possible that the presence of Treg cells generated in the primary  
472 response to MOG inhibited the subsequent secondary response. To eliminate this possibility,  
473 GFP<sup>+</sup> antigen specific CD38<sup>hi</sup> CD95<sup>lo</sup> memory phenotype cells were FACS sorted from  
474 mMOG<sub>tag</sub> or NPOVA immunized mice and equal numbers were transferred to new SMARTA  
475 recipients along with naive T cells specific for the relevant antigen. Following secondary  
476 challenge, small numbers of GFP<sup>+</sup> NP-specific cells were recovered, the majority of which were  
477 plasma cells or GC B cells (Figure 6F). In contrast, MOG-specific cells were either completely

478 undetectable or exclusively of the CD38<sup>hi</sup> CD95<sup>lo</sup> phenotype, indicating that they had not  
479 responded to secondary challenge.

480

481 To determine if the unresponsiveness of MOG-specific memory B cells was due to education  
482 from MOG-specific T cells, an experiment was performed to determine if MOG-specific T cells  
483 could educate NP-specific B cells to be similarly unresponsive. After transfer of NP-specific B  
484 cells along with the appropriate OVA or MOG-specific T cells, recipient mice were immunized  
485 with NPOVA or NPMOG in the left footpad only. 32d later, mice received naive T cells specific  
486 for the reciprocal antigen and were then challenged with that antigen in the right footpad 2d later  
487 (Figure 7A). Left and right draining lymph nodes were analyzed separately by FACS 5d post  
488 secondary challenge. Analysis of the primary response in the left lymph node revealed that, as at  
489 d10 (Figure 3), the NP-specific B cell response under control of MOG-specific T cells was  
490 heavily biased to memory-phenotype cells at the expense of GC B cells (Figure 7B). The  
491 presence of IgG-producing long-lived plasma cells in the bone marrow was also reduced (Figure  
492 7C). In contrast, and as opposed to the MOG-specific B cells in the previous experiment (Figure  
493 6C), there was no difference in the proportion of CD80 PDL2 double negative memory NP-  
494 specific B cells under the control of either T cell (Figure 7D), nor was there a defect in class  
495 switch of memory cells (Figure 7E). Also, analysis of the right lymph node clearly demonstrated  
496 that NP-specific B cells educated by MOG-specific T cells in the primary response were able to  
497 respond to secondary challenge (Figure 7B).

498 **Discussion:**

499 Here, we use manipulatable antigen model systems as a novel approach to investigate how the  
500 immune system controls B cell fate choice and differentiation to produce different GC outcomes  
501 tailored to the specific antigen. The response to NPOVA and other NP haptenated proteins is  
502 well characterized (Shlomchik and Weisel, 2012; Weisel et al., 2016), and in many ways is  
503 considered to represent the default response to a foreign antigen. We and others have shown that  
504 the anti-NP GC consistently forms 4-5d after exposure to antigen, peaks ~2 wks post exposure,  
505 and remains active for several weeks after that (Kerfoot et al., 2011; Zuccarino-Catania et al.,  
506 2014). We show here that, while the GC response to MOG develops with similar kinetics, it is  
507 not sustained and instead dissociates early. This should not be interpreted as failed GC response,  
508 however, as it still produces measurable levels of circulating, class switched anti-MOG antibody.  
509 Further, subcutaneous immunization with MOG protein is a well-established method to induce  
510 the anti-myelin autoimmune model experimental autoimmune encephalomyelitis (EAE). In our  
511 hands, mice immunized with mMOG<sub>tag</sub> develop a robust disease with evidence that GC-derived  
512 anti-MOG B cells contribute to both disease severity and chronic disease course (Dang et al.,  
513 2015; Tesfagiorgis et al., 2017). Therefore, although short-lived, the MOG GC is productive.  
514

515 The GC responses is sustained by interactions between GC B cells and Tfh cells, predominantly  
516 in the LZ of the GC. The outcome of these interactions can select B cells to maintain their GC  
517 status and cycle back into the DZ for additional rounds of cell division, mutation, and return to  
518 the LZ for selection (Mesin et al., 2016). Alternatively, GC B cells can be driven to memory or  
519 plasma cells fates (Suan et al., 2017). The first major finding of our study is that, in the MOG  
520 GC response, early failure of the GC is due to preferential differentiation to a memory phenotype



521 at the expense of maintaining the GC. Indeed, within the small GC B cell population in the  
522 collapsing MOG response there is a clear bias to a LZ phenotype, suggesting that cells are not  
523 being selected to return to the DZ for proliferation. A similar bias to memory cell differentiation  
524 is seen for B cells defective in CXCR4, which is required for proper DZ B cell homing (Bannard  
525 et al., 2013). By histology, this manifests as a small, less-organized GC with a large number of  
526 individual GFP<sup>+</sup> cells distributed throughout the follicle. In the GC response to a foreign antigen,  
527 memory B cell differentiation has been shown to occur predominantly in the early stages, shortly  
528 after GC formation, with plasma cell differentiation preferentially occurring later in the response  
529 (Weisel et al., 2016). Therefore, it is possible that the early dissolution of the MOG GC to  
530 generate memory B cells represents an extreme acceleration of this same process.

531

532 It is clear from our observations that the status of the cognate T cell partner strongly influences  
533 the dichotomy between GC maintenance and memory B cell differentiation, along with class  
534 switch. Indeed, MOG-reactive T cells induced a similar GC outcome when paired with NP-  
535 specific B cells and enhanced T cell activation via high affinity antigen partly rescued the MOG  
536 GC from collapse and reduced memory B cell differentiation. In this case, class switch was not  
537 impacted, suggesting that there is a gradient to the GC parameters that are influenced by T cell  
538 status. Interestingly, while BCR affinity has previously been linked to plasma cell differentiation  
539 (Kräutler et al., 2017; Paus et al., 2006) (see below), this is the first report that we are aware of  
540 that demonstrates that TCR affinity for antigen can impact B cell fate choice.

541

542 It is not clear what signals the cognate T cell partners use to drive differential GC maintenance  
543 vs memory B cell differentiation in the two model systems. Previously identified T cell signals

544 that influence GC formation and memory differentiation include ICOS and PD-1 (Good-  
545 Jacobson et al., 2010; Liu et al., 2015). Tfh-produced cytokines, IL-21, IL4, and IL-10 have also  
546 been shown to be required for proper GC development (Laidlaw et al., 2017; Linterman et al.,  
547 2010; Weinstein et al., 2016). Nevertheless, we did not find evidence that these are differentially  
548 expressed by Tfh cells in the NPOVA and MOG systems. Therefore, the immune system may  
549 employ other signals to modulate GC outcome in response to different antigens. The size of the  
550 Tfh cell pool itself may be one of these “signals”, as we consistently observed a direct  
551 correlation between the number of Tfh and GC B cells in our different model systems. An  
552 attempt to modulate this by increasing the total T cell response was not successful, suggesting  
553 that other factors limit the size of the Tfh cell niche in an antigen-dependent way. Indeed,  
554 maintenance of the PD-1<sup>hi</sup> phenotype on Tfh cells is dependent on their ongoing cognate  
555 interactions with B cells (Baumjohann et al., 2011; Kerfoot et al., 2011). Therefore, it is difficult  
556 to separate cause and effect with regards to the GC B cell:Tfh cell ratio.

557

558 While the balance between GC maintenance and memory B cell differentiation, along with class  
559 switch, were heavily influenced by the status of the cognate T cell partner, plasma cell  
560 differentiation and memory B cell unresponsiveness were not. Plasma cell differentiation has  
561 been linked to BCR affinity (Kräutler et al., 2017; Paus et al., 2006). Further, plasma cells  
562 preferentially differentiate later in the GC response compared to memory cells (Weisel et al.,  
563 2016). It is possible that the MOG GC doesn't last long enough to produce BCRs with  
564 sufficiently high affinity to promote plasma cell differentiation. The accumulation of somatic  
565 mutations in anti-MOG B cells and BCR affinity for antigen will need to be explored in future  
566 studies. However, this would not explain the almost complete absence of early, short lived

567 plasmablasts that typically derive from pre-GC interactions. The starting affinity for antigen in  
568 the Ig-heavy chain knockin (IgH<sup>MOG</sup>) B cells is clearly sufficient to allow for B cell activation to  
569 proliferate and initiate the GC. Additional investigation will be required to determine if  
570 (potentially) low BCR affinity accounts for reduced plasma cell formation, or if the few (but  
571 productive) plasma cells that do form in the MOG GC response represent clones that attained a  
572 threshold affinity that allowed for their differentiation.

573

574 Finally, we believe that this is the first demonstration of unresponsive memory B cells derived  
575 from a GC response, although they may be related to so-called “atypical” CD27<sup>-</sup> CD21<sup>-</sup> memory  
576 B cells identified in humans (Weisel and Shlomchik, 2017), and reported to be enriched in  
577 autoimmune conditions including MS (Claes et al., 2016). These B cells have been reported to be  
578 partly anergic (defined as having reduced BCR signaling capacity), however their role in driving  
579 or limiting inflammation is not well understood. It is not yet clear if anergy is the mechanism  
580 behind the memory B cell unresponsiveness in our MOG system. As with plasma cell  
581 differentiation, this non-responsiveness was not influenced by the status of the T cell partner as  
582 MOG-specific T cells did not educate NP-specific memory B cells to become non-responsive.  
583 Moreover, fresh naïve T cells were not able to rescue the anti-MOG memory B cells from their  
584 non-responsive state. The CD80<sup>-</sup> PD-L2<sup>-</sup> double negative status of these memory-phenotype cells  
585 was also not the result of T cell education and may be linked to their non-responsiveness,  
586 although double negative memory cells have previously been associated with preferential GC  
587 formation following secondary challenge (Zuccarino-Catania et al., 2014). Further study will be  
588 required to determine if this induced non-responsiveness is the result of tolerance mechanisms  
589 resulting from previous exposure to endogenous MOG antigen. Importantly, MOG-specific B

590 cells are not initially unresponsive, as they generate a GC in the primary response, but only  
591 become unresponsive post-activation.

592

593 In conclusion, we show here that different antigens can drive GC responses with very different  
594 outcomes. Further, we identify GC maintenance vs memory B cell differentiation as a fate  
595 decision dichotomy that is regulated independently from plasma cell differentiation, and that the  
596 status of the cognate T cell partner heavily influences the former, but not the latter. Finally, we  
597 show that B cells can be induced during the GC response to be unresponsive to secondary  
598 challenge. Our findings have implications both for our fundamental understanding of how B cell  
599 fate choice is regulated in the GC response, and for our understanding of how autoimmune B  
600 cells participate in autoimmune responses, and anti-myelin responses in particular.

601 **Acknowledgements:**

602 The authors would like to thank the veterinarians and animal care staff at the West Valley Barrier  
603 Facility for their excellent husbandry of our experimental animals. RWJ is the recipient of an  
604 endMS Doctoral Studentship from the Multiple Sclerosis Society of Canada (MSSOC). KAP is  
605 the recipient of a endMS Post-Doctoral Fellowship from MSSOC. YT is supported by an Ontario  
606 Graduate Scholarship.

607

608

609 **Author Contributions:**

610 RWJ performed the bulk of the experiments and contributed to conceptualization and writing.  
611 KAP, YT, and HBC contributed experiments, and ER participated in image analysis. SMK  
612 provided supervision and contributed to writing.

613

614

615 **Declaration of Interests:**

616 The authors declare no competing interests.

617 **References:**

618

619 Bannard, O., Horton, R.M., Allen, C.D.C., An, J., Nagasawa, T., and Cyster, J.G. (2013).

620 Germinal center centroblasts transition to a centrocyte phenotype according to a timed program

621 and depend on the dark zone for effective selection. *Immunity* 39, 912-924.

622 Baumjohann, D., Okada, T., and Ansel, K.M. (2011). Cutting Edge: Distinct waves of BCL6

623 expression during T follicular helper cell development. *J Immunol* 187, 2089-2092.

624 Bettelli, E., Pagany, M., Weiner, H.L., Linington, C., Sobel, R.A., and Kuchroo, V.K. (2003).

625 Myelin oligodendrocyte glycoprotein-specific T cell receptor transgenic mice develop

626 spontaneous autoimmune optic neuritis. *J Exp Med* 197, 1073-1081.

627 Chen, J., Trounstein, M., Alt, F.W., Young, F., Kurahara, C., Loring, J.F., and Huszar, D. (1993).

628 Immunoglobulin gene rearrangement in B cell deficient mice generated by targeted deletion of

629 the JH locus. *Int Immunol* 5, 647-656.

630 Claes, N., Fraussen, J., Vanheusden, M., Hellings, N., Stinissen, P., Van Wijmeersch, B.,

631 Hupperts, R., and Somers, V. (2016). Age-Associated B Cells with Proinflammatory

632 Characteristics Are Expanded in a Proportion of Multiple Sclerosis Patients. *J Immunol* 197,

633 4576-4583.

634 Corcoran, L.M., and Tarlinton, D.M. (2016). Regulation of germinal center responses, memory

635 B cells and plasma cell formation-an update. *Current opinion in immunology* 39, 59-67.

636 Dang, A.K., Jain, R.W., Craig, H.C., and Kerfoot, S.M. (2015). B cell recognition of myelin

637 oligodendrocyte glycoprotein autoantigen depends on immunization with protein rather than

638 short peptide, while B cell invasion of the CNS in autoimmunity does not. *Journal of*  
639 *Neuroimmunology* 278C, 73-84.

640 Deng, L., and Mariuzza, R.A. (2007). Recognition of self-peptide-MHC complexes by  
641 autoimmune T-cell receptors. *Trends in biochemical sciences* 32, 500-508.

642 Good-Jacobson, K.L., Szumilas, C.G., Chen, L., Sharpe, A.H., Tomayko, M.M., and Shlomchik,  
643 M.J. (2010). PD-1 regulates germinal center B cell survival and the formation and affinity of  
644 long-lived plasma cells. *Nat Immunol* 11, 535-542.

645 Jain, R.W., Dang, A.K., and Kerfoot, S.M. (2016). Simple and effective production and  
646 purification of mouse Myelin Oligodendrocyte Glycoprotein for Experimental Autoimmune  
647 Encephalomyelitis. *Journal of Visualized Experiments In Press*.

648 Kerfoot, S.M., Yaari, G., Patel, J.R., Johnson, K.L., Gonzalez, D.G., Kleinstein, S.H., and  
649 Haberman, A.M. (2011). Germinal center B cell and T follicular helper cell development  
650 initiates in the interfollicular zone. *Immunity* 34, 947-960.

651 Kräutler, N.J., Suan, D., Butt, D., Bourne, K., Hermes, J.R., Chan, T.D., Sundling, C., Kaplan,  
652 W., Schofield, P., Jackson, J., *et al.* (2017). Differentiation of germinal center B cells into plasma  
653 cells is initiated by high-affinity antigen and completed by Tfh cells. *J Exp Med* 214, 1259-1267.

654 Krishnamoorthy, G., Saxena, A., Mars, L.T., Domingues, H.S., Mentele, R., Ben-Nun, A.,  
655 Lassmann, H., Dornmair, K., Kurschus, F.C., Liblau, R.S., and Wekerle, H. (2009). Myelin-  
656 specific T cells also recognize neuronal autoantigen in a transgenic mouse model of multiple  
657 sclerosis. *Nat Med* 15, 626-632.

658 Laidlaw, B.J., Lu, Y., Amezquita, R.A., Weinstein, J.S., Vander Heiden, J.A., Gupta, N.T.,  
659 Kleinstein, S.H., Kaech, S.M., and Craft, J. (2017). Interleukin-10 from CD4+ follicular  
660 regulatory T cells promotes the germinal center response. *Sci Immunol* 2, eaan4767.

661 Linterman, M.A., Beaton, L., Yu, D., Ramiscal, R.R., Srivastava, M., Hogan, J.J., Verma, N.K.,  
662 Smyth, M.J., Rigby, R.J., and Vinuesa, C.G. (2010). IL-21 acts directly on B cells to regulate  
663 Bcl-6 expression and germinal center responses. *J Exp Med* 207, 353-363.

664 Litzemberger, T., Fässler, R., Bauer, J., Lassmann, H., Linington, C., Wekerle, H., and Iglesias,  
665 A. (1998). B lymphocytes producing demyelinating autoantibodies: development and function in  
666 gene-targeted transgenic mice. *J Exp Med* 188, 169-180.

667 Liu, D., Xu, H., Shih, C., Wan, Z., Ma, X., Ma, W., Luo, D., and Qi, H. (2015). T-B-cell  
668 entanglement and ICOSL-driven feed-forward regulation of germinal centre reaction. *Nature*  
669 517, 214-218.

670 Maruyama, M., Lam, K.P., and Rajewsky, K. (2000). Memory B-cell persistence is independent  
671 of persisting immunizing antigen. *Nature* 407, 636-642.

672 Mesin, L., Ersching, J., and Victora, G.D. (2016). Germinal Center B Cell Dynamics. *Immunity*  
673 45, 471-482.

674 Paus, D., Phan, T.G., Chan, T.D., Gardam, S., Basten, A., and Brink, R. (2006). Antigen  
675 recognition strength regulates the choice between extrafollicular plasma cell and germinal center  
676 B cell differentiation. *J Exp Med* 203, 1081-1091.



- 677 Ramadan, A., Lucca, L.E., Carrié, N., Desbois, S., Axisa, P.-P., Hayder, M., Bauer, J., Liblau,  
678 R.S., and Mars, L.T. (2016). In situ expansion of T cells that recognize distinct self-antigens  
679 sustains autoimmunity in the CNS. *Brain : a journal of neurology* *139*, aww032-1446.
- 680 Rosenthal, K.M., Edwards, L.J., Sabatino, J.J., Hood, J.D., Wasserman, H.A., Zhu, C., and  
681 Evavold, B.D. (2012). Low 2-dimensional CD4 T cell receptor affinity for myelin sets in motion  
682 delayed response kinetics. *PLoS ONE* *7*, e32562.
- 683 Shlomchik, M.J., and Weisel, F. (2012). Germinal centers. *Immunol Rev* *247*, 5-10.
- 684 Shulman, Z., Gitlin, A.D., Weinstein, J.S., Lainez, B., Esplugues, E., Flavell, R.A., Craft, J.E.,  
685 and Nussenzweig, M.C. (2014). Dynamic signaling by T follicular helper cells during germinal  
686 center B cell selection. *Science* *345*, 1058-1062.
- 687 Stern, J.N.H., Yaari, G., Vander Heiden, J.A., Church, G., Donahue, W.F., Hintzen, R.Q.,  
688 Huttner, A.J., Laman, J.D., Nagra, R.M., Nylander, A., *et al.* (2014). B cells populating the  
689 multiple sclerosis brain mature in the draining cervical lymph nodes. *Sci Transl Med* *6*,  
690 248ra107-248ra107.
- 691 Suan, D., Sundling, C., and Brink, R. (2017). Plasma cell and memory B cell differentiation from  
692 the germinal center. *Current opinion in immunology* *45*, 97-102.
- 693 Tesfagiorgis, Y., Zhu, S.L., Jain, R., and Kerfoot, S.M. (2017). Activated B Cells Participating in  
694 the Anti-Myelin Response Are Excluded from the Inflamed Central Nervous System in a Model  
695 of Autoimmunity that Allows for B Cell Recognition of Autoantigen. *J Immunol* *199*, 449-457.

- 696 Tomayko, M.M., Steinel, N.C., Anderson, S.M., and Shlomchik, M.J. (2010). Cutting edge:  
697 Hierarchy of maturity of murine memory B cell subsets. *J Immunol* *185*, 7146-7150.
- 698 Victora, G.D., and Nussenzweig, M.C. (2012). Germinal centers. *Annual review of immunology*  
699 *30*, 429-457.
- 700 Vinuesa, C.G., Linterman, M.A., Yu, D., and MacLennan, I.C.M. (2016). Follicular Helper T  
701 Cells. *Annual review of immunology* *34*, 335-368.
- 702 von Büdingen, H.C., Kuo, T.C., Sirota, M., van Belle, C.J., Apeltsin, L., Glanville, J., Cree,  
703 B.A., Gourraud, P.-A., Schwartzburg, A., Huerta, G., *et al.* (2012). B cell exchange across the  
704 blood-brain barrier in multiple sclerosis. *J Clin Invest* *122*, 4533-4543.
- 705 Weinstein, J.S., Herman, E.I., Lainez, B., Licona-Limón, P., Esplugues, E., Flavell, R., and  
706 Craft, J. (2016). TFH cells progressively differentiate to regulate the germinal center response.  
707 *Nat Immunol* *17*, 1197-1205.
- 708 Weisel, F., and Shlomchik, M. (2017). Memory B Cells of Mice and Humans. *Annual review of*  
709 *immunology* *35*, 255-284.
- 710 Weisel, F.J., Zuccarino-Catania, G.V., Chikina, M., and Shlomchik, M.J. (2016). A Temporal  
711 Switch in the Germinal Center Determines Differential Output of Memory B and Plasma Cells.  
712 *Immunity* *44*, 116-130.
- 713 Zuccarino-Catania, G.V., Sadanand, S., Weisel, F.J., Tomayko, M.M., Meng, H., Kleinstein,  
714 S.H., Good-Jacobson, K.L., and Shlomchik, M.J. (2014). CD80 and PD-L2 define functionally

715 distinct memory B cell subsets that are independent of antibody isotype. *Nat Immunol* *15*, 631-  
716 637.  
717

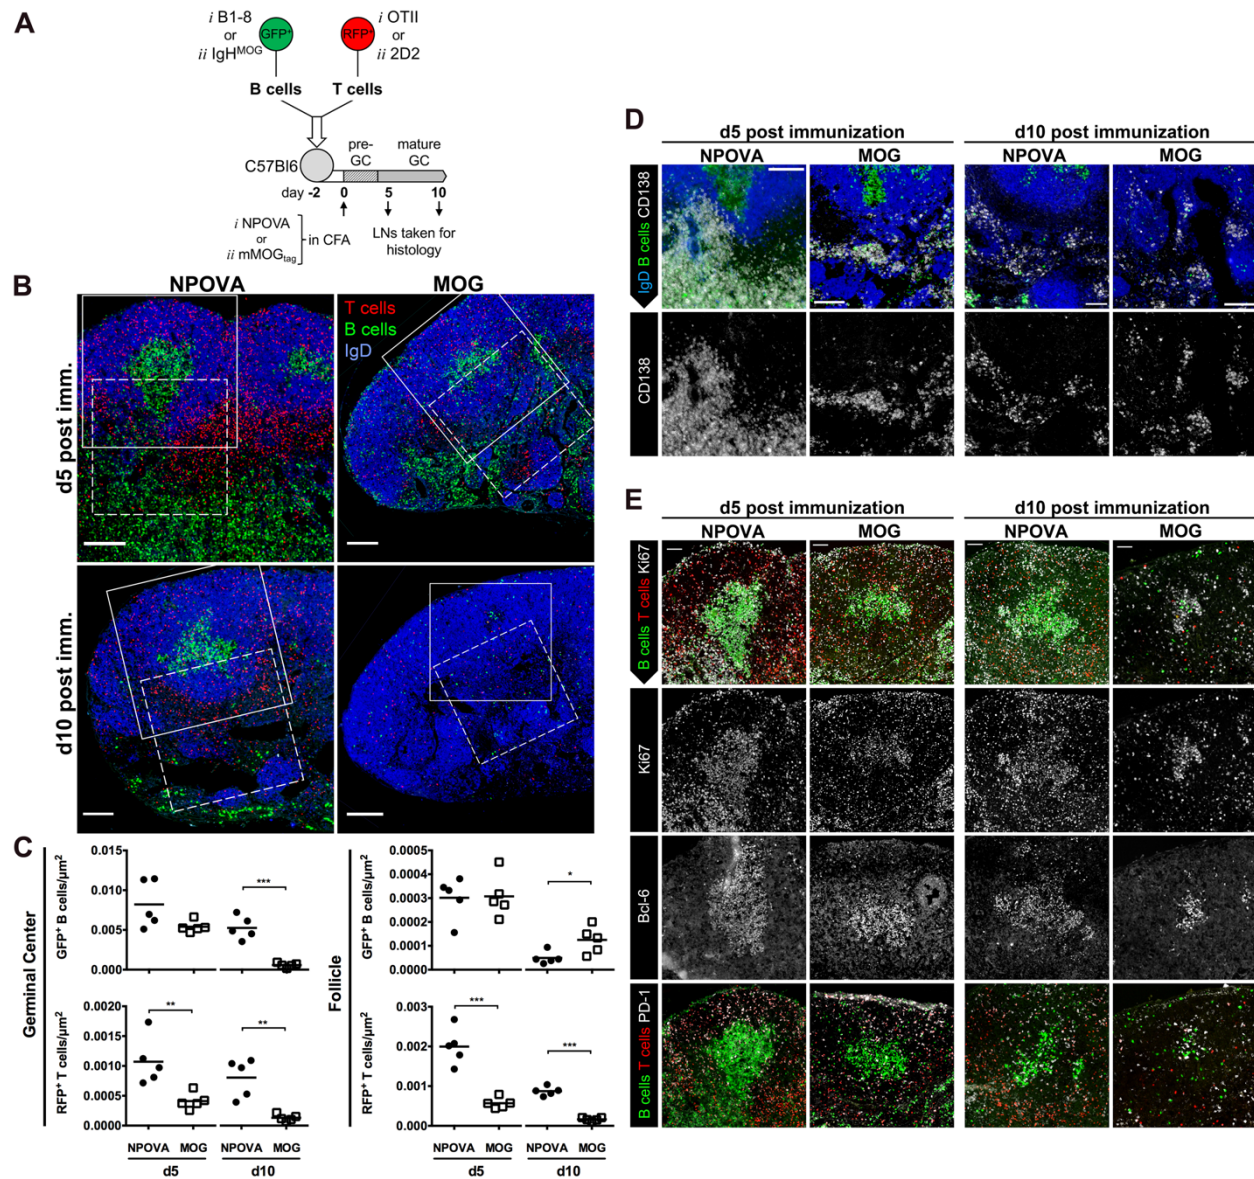

718

719

720 **Figure 1: Differential GC development in the NPOVA and MOG model antigen systems.**

721 (A) Fluorescent B and CD4<sup>+</sup> T cells specific for NPOVA or MOG were isolated and transferred  
 722 into wild type, non-fluorescent recipients. Two days post-transfer, mice were immunized with  
 723 either NPOVA or mMOG<sub>tag</sub> in CFA in the footpad. Draining popliteal lymph nodes were  
 724 harvested for histology d5 and d10 post immunization, representing the early and mature GCs.

725 (B) Immunofluorescence of lymph nodes from NPOVA and mMOG<sub>tag</sub> immunized mice to

726 visualize RFP<sup>+</sup> T cells and GFP<sup>+</sup> B cells derived from transferred antigen-specific cells. Sections  
727 were also stained for IgD to outline B cell follicles. Scale bars represent 100  $\mu$ m. (C) The density  
728 of GFP<sup>+</sup> or RFP<sup>+</sup> cells in the GC or follicle was quantified. Each data point represents the  
729 average value across one histological section for a single mouse. \*  $p < 0.05$ , \*\* $p < 0.01$ ,  
730 \*\*\* $p < 0.001$ . (D) Higher magnification of the regions of interest outlined by the dashed lines in  
731 panel B showing CD138 staining for plasma cells. (E) Higher magnification of the regions of  
732 interest outlined by the solid white line in panel B were further examined for Ki67, Bcl6, and  
733 PD-1 expression.

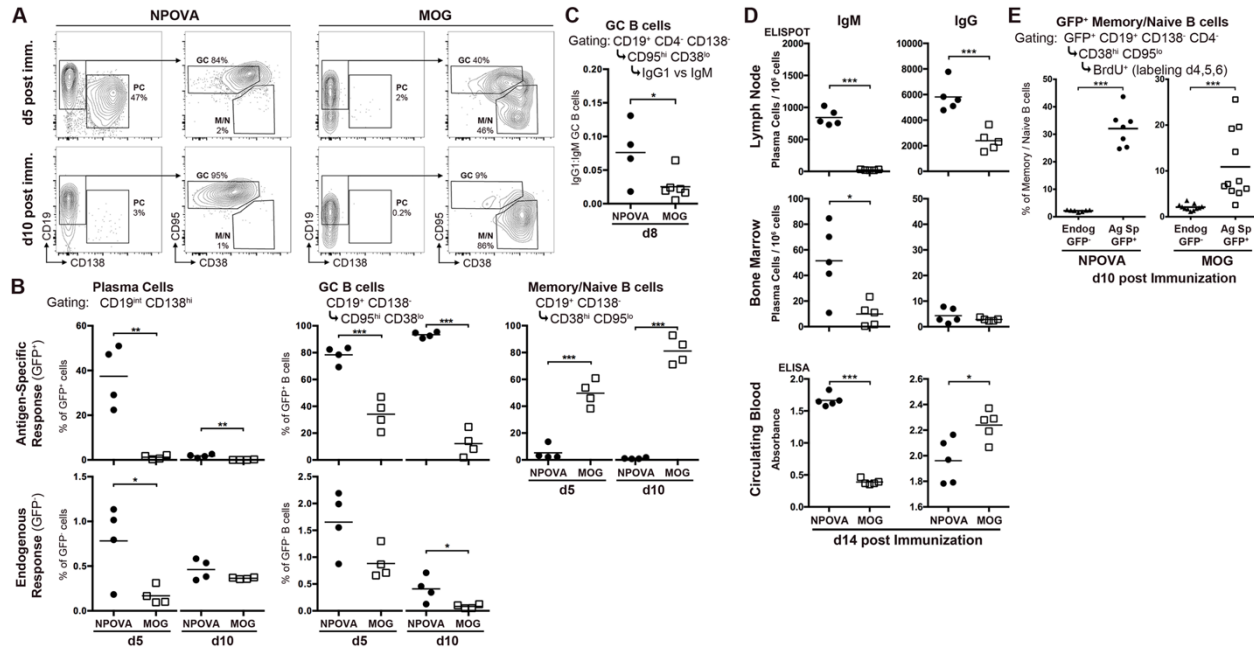

734

735

736 **Figure 2: Early collapse of the MOG GC to a memory phenotype.** Fluorescent B and CD4<sup>+</sup> T

737 cells specific for NPOVA or MOG were transferred into non-fluorescent C57Bl/6 mice that were

738 then immunized with NPOVA or mMOG<sub>tag</sub>. Draining lymph nodes were harvested for analysis

739 by FACS d5 and d10 post-immunization. (A) Representative gating of GFP<sup>+</sup> cells for plasma

740 cells (PC), GC B cells, and memory/naive B cells (M/N). (B) Quantification from panel A

741 showing size of each cell subset (as defined in panel A, gating shown above each plot) derived

742 from the transferred GFP<sup>+</sup> B cells (top row) or from endogenous GFP<sup>-</sup> cells (bottom row). Data

743 is expressed as the percentage of all GFP<sup>+</sup> cells for Plasma cells, or percentage of all GFP<sup>+</sup> B

744 cells (CD19<sup>+</sup> CD138<sup>-</sup>) for GC and Memory/Naïve B cells. One representative of two separate

745 experiments is shown. (C) The ratio of IgG1 expressing cells over IgM expressing GC B cells d8

746 post-immunization is shown. (D) C57Bl/6 mice were immunized with either NPOVA or

747 mMOG<sub>tag</sub> in CFA. d14 post-immunization, draining popliteal lymph nodes and bone marrow

748 were taken for ELISpot analysis of NP- or MOG-specific IgM or IgG. Blood serum from the

749 same mice was assayed by ELISA for circulating anti-NP or -MOG IgM or IgG antibodies. (E)  
750 Fluorescent antigen-specific B and T cells were transferred into non-fluorescent SMARTA  
751 recipient mice and immunized with NPOVA or mMOG<sub>tag</sub>. Mice were injected i.p. with BrdU d4,  
752 d5, and d6 post-immunization and BrdU incorporation in the GFP<sup>+</sup> or GFP<sup>-</sup> memory/naïve B cell  
753 populations was assessed by FACS d10 post-immunization. Each graph represents a separate  
754 experiment and the data points in the mMOG graph were pooled from two separate experiments.  
755 In all graphs, each data point represents an individual mouse. \* p<0.05, \*\*p<0.01, \*\*\*p<0.001.



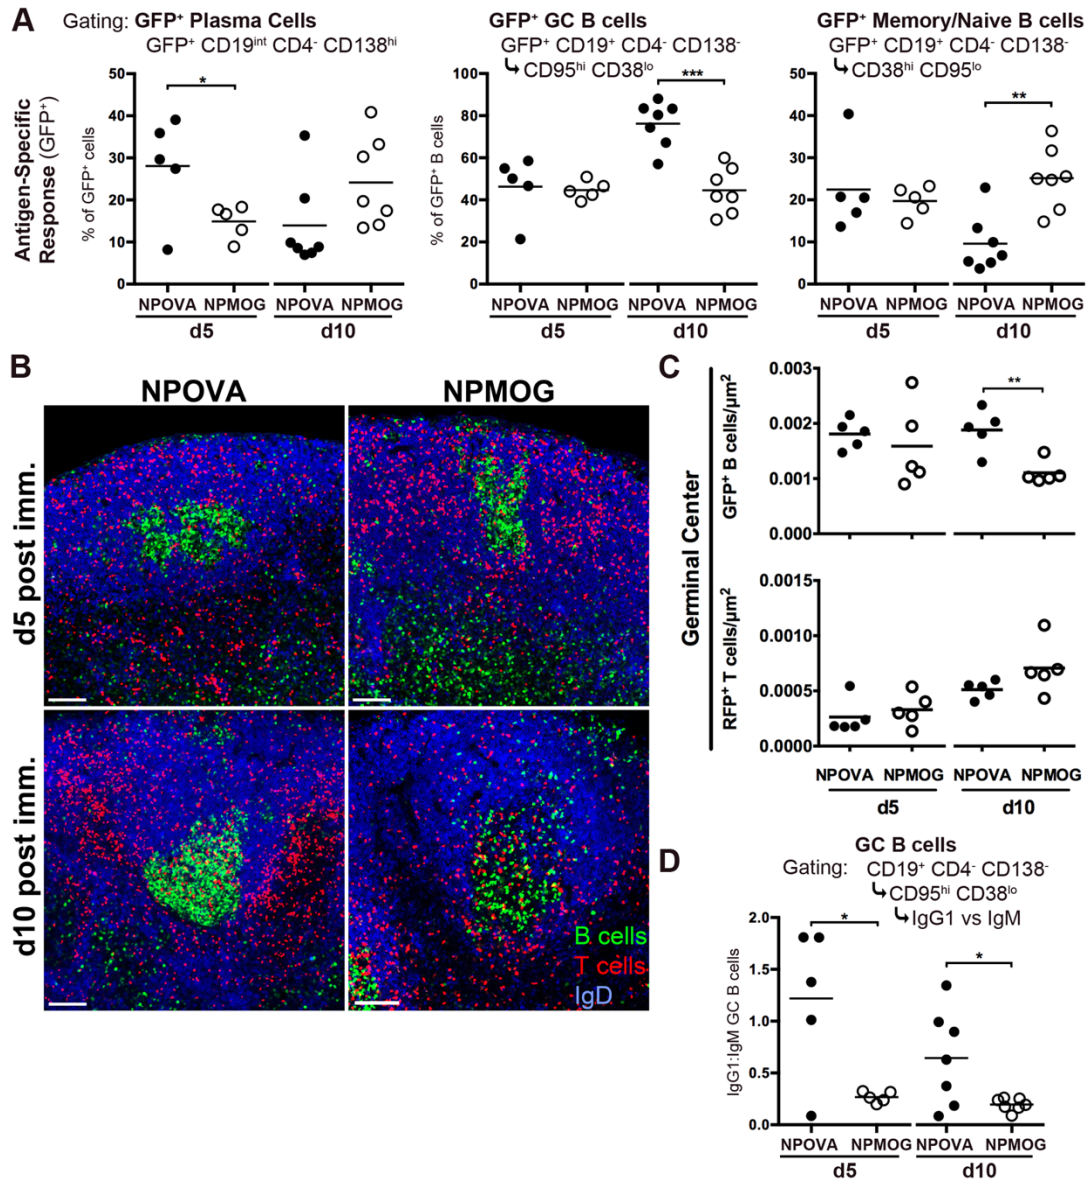

756

757

758 **Figure 3: MOG-specific T cells induce early GC collapse to a memory phenotype.**

759 Fluorescent NP-specific B cells and either OVA or MOG-specific CD4<sup>+</sup> T cells were transferred  
 760 into non-fluorescent SMARTA recipients that were then immunized with either NPOVA or  
 761 NPMOG. Draining popliteal lymph nodes were harvested for analysis by FACS or, in a separate  
 762 experiment, histology d5 and d10 post immunization. (A) The size of the given cell subset is  
 763 shown as a percentage of all GFP<sup>+</sup> cells (Plasma cells) or all GFP<sup>+</sup> B cells (GC B cells and



764 Memory/Naïve B cells). The d5 and d10 time points were assessed in separate experiments, data  
765 shown is representative of 2 to 3 individual experiments. **(B)** Representative histological sections  
766 from NPOVA or NPMOG-immunized mice to visualize NP-specific GFP<sup>+</sup> B cells and either  
767 RFP<sup>+</sup> OVA-specific or MOG-specific T cells, respectively. Sections were stained for IgD to  
768 outline B cell follicles. **(C)** The density of GFP<sup>+</sup> or RFP<sup>+</sup> cells in the GC was quantified from  
769 histological images. **(D)** The ratio of IgG1- over IgM-expressing GC B cells d5 and d10 post-  
770 immunization was determined in a separate FACS experiment. Each data point represents an  
771 individual mouse. \* p<0.05, \*\*p<0.01, \*\*\*p<0.001.

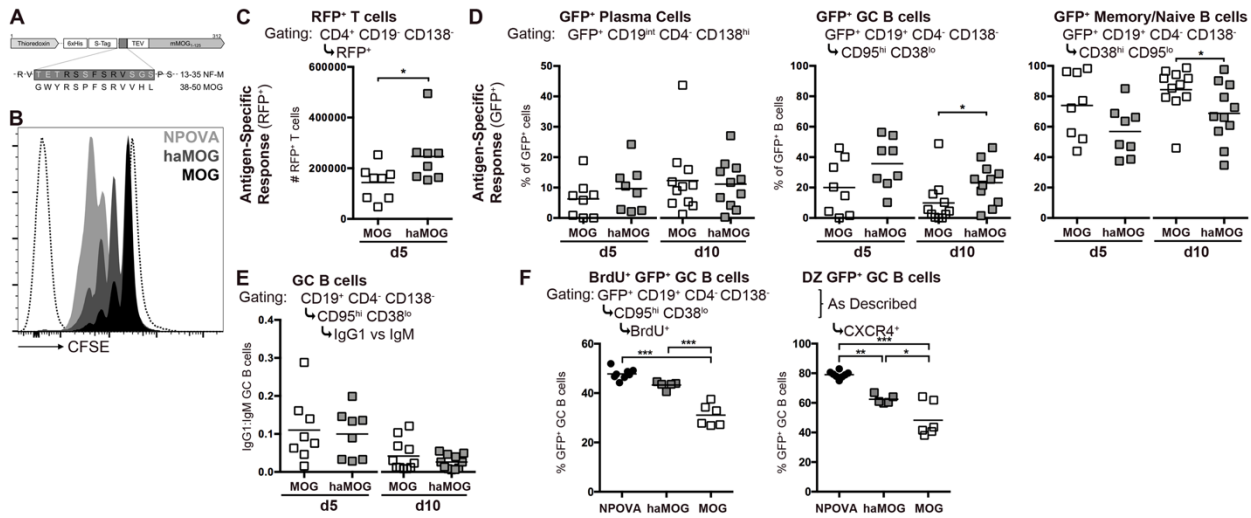

772

773

774 **Figure 4: Increasing T cell antigen affinity partly rescues the MOG GC from early**

775 **collapse.** **(A)** A schematic of the haMOG<sub>tag</sub> Ag showing the insertion of amino acids 13-35 from

776 neurofilament-M (with sequence comparison to the MOG<sub>35-55</sub> peptide) **(B)** *In vitro* proliferation

777 assay measuring CFSE-dilution of labeled OVA-specific T cells cultured for 3d with NPOVA-

778 loaded splenocytes, or labeled 2D2 T cells cultured with mMOG<sub>tag</sub>, or haMOG<sub>tag</sub>-loaded

779 splenocytes. A representative (of 3 separate experiments) histogram for each condition is shown.

780 The dashed lines represent GC unlabeled (left) and fully CFSE-labelled (right) OTII T cells. **(C-E)**

781 Fluorescent MOG-specific B and T cells were transferred into non-fluorescent SMARTA

782 recipients that were then immunized with mMOG<sub>tag</sub> or haMOG<sub>tag</sub>. Draining popliteal lymph

783 nodes were harvested for analysis by FACS d5 and d10 post-immunization. The d5 and d10 time

784 points were assessed in separate experiments, data shown is the combination of two separate

785 experiments. **(C)** The absolute number of RFP<sup>+</sup> T cells is shown d5 post-immunization. **(D)** The

786 size of the given cell subset at both 5 and 10d post immunization is shown as a percentage of all

787 GFP<sup>+</sup> cells (Plasma cells) or all GFP<sup>+</sup> B cells (GC B cells and Memory/Naïve B cells). **(E)** The

788 ratio of IgG1- over IgM-expressing cells was determined for GC B cells. **(F)** Fluorescent Ag-

789 specific B and T cells were transferred into non-fluorescent SMARTA recipients that were then  
790 immunized with NPOVA, mMOG<sub>tag</sub>, or haMOG<sub>tag</sub>. Mice were injected i.p. with BrdU 7d post  
791 immunization, and draining popliteal and inguinal lymph nodes were harvested for analysis by  
792 FACS 12hrs later. The percentage of GFP<sup>+</sup> GC B cells that are BrdU<sup>+</sup> (left) or CXCR4<sup>+</sup> (right) is  
793 shown. Each data point represents an individual mouse. \* p<0.05, \*\*p<0.01, \*\*\*p<0.001.

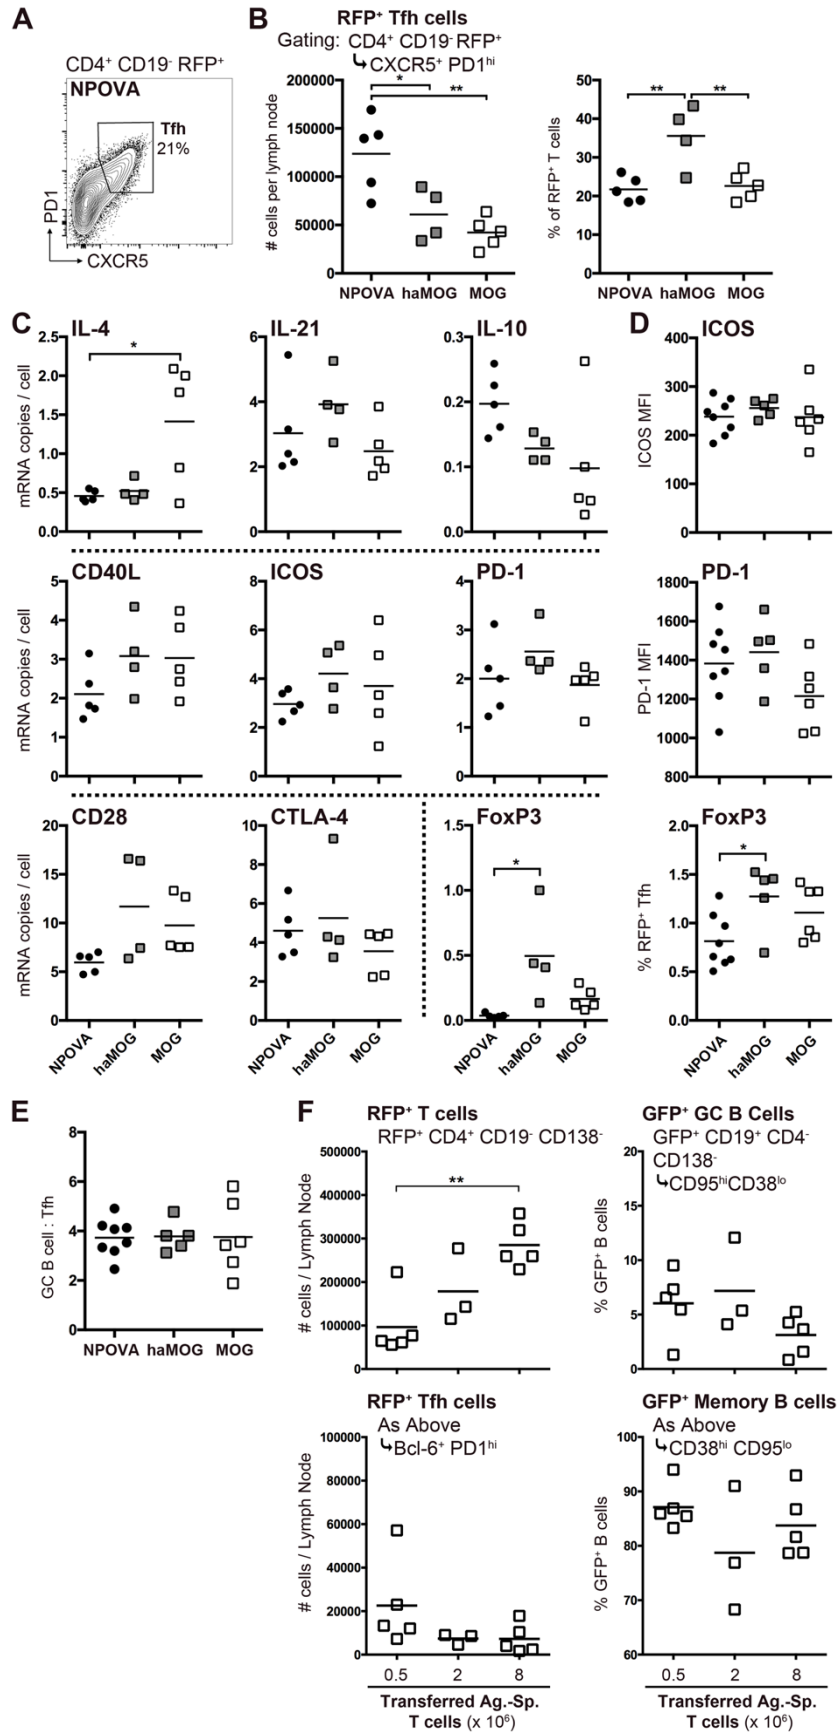

795 **Figure 5: Tfh cell phenotype is not altered by antigen.** (A-C) RFP<sup>+</sup> antigen-specific T cells  
796 were transferred along with non-fluorescent antigen-specific B cells into non-fluorescent  
797 SMARTA recipient mice that were then immunized with NPOVA, mMOG<sub>tag</sub>, or haMOG<sub>tag</sub> in  
798 CFA. Draining popliteal and inguinal lymph nodes were harvested 10d later and Tfh cells (CD4<sup>+</sup>  
799 CD19<sup>-</sup> RFP<sup>+</sup> CXCR5<sup>+</sup> PD-1<sup>hi</sup>) were FACS sorted for subsequent analysis of gene expression by  
800 digital droplet PCR. One representative of two independent experiments is shown. (A) An  
801 example of gating for CXCR5<sup>+</sup> PD-1<sup>hi</sup> Tfh cells is shown. (B) The absolute number of Tfh cells  
802 per lymph node is shown (left panel), along with size of the Tfh population as a percentage of  
803 total RFP<sup>+</sup> T cells (right panel). (C) Digital droplet PCR analysis of mRNA levels (copies per  
804 cell) for the listed gene. (D-E) Fluorescent antigen-specific B and T cells were transferred into  
805 non-fluorescent SMARTA recipients that were then immunized with NPOVA, mMOG<sub>tag</sub>, or  
806 haMOG<sub>tag</sub>. Draining popliteal and inguinal lymph nodes were harvested 8d post immunization  
807 for analysis by FACS. (D) Mean fluorescence intensity (MFI) for ICOS and PD-1 on RFP<sup>+</sup>  
808 CXCR5<sup>+</sup> PD-1<sup>hi</sup> Tfh cells (top two panels) and the percent of Tfh cells (Bcl6<sup>+</sup> PD-1<sup>hi</sup>) that were  
809 FoxP3<sup>+</sup> (bottom panel) are shown. (E) Ratio of GC B cells to Tfh cells in the different antigen  
810 systems. (F) Fluorescent MOG-specific B cells and different numbers of MOG-specific T cells  
811 (0.5, 2, or 8 x 10<sup>6</sup> 2D2 T cells) were transferred into non-fluorescent SMARTA recipients that  
812 were then immunized with mMOG<sub>tag</sub>. Draining popliteal lymph nodes were harvested 10d post  
813 immunization for FACS analysis. The absolute number of RFP<sup>+</sup> T cells per lymph node (top left  
814 panel) and RFP<sup>+</sup> Tfh cells per lymph node is shown (bottom left panel). The percentage of the  
815 GFP<sup>+</sup> B cells with a GC B cell (top right panel) or memory B cell (bottom right panel) phenotype  
816 is shown. Each data point represents an individual mouse. \* p<0.05, \*\*p<0.01.

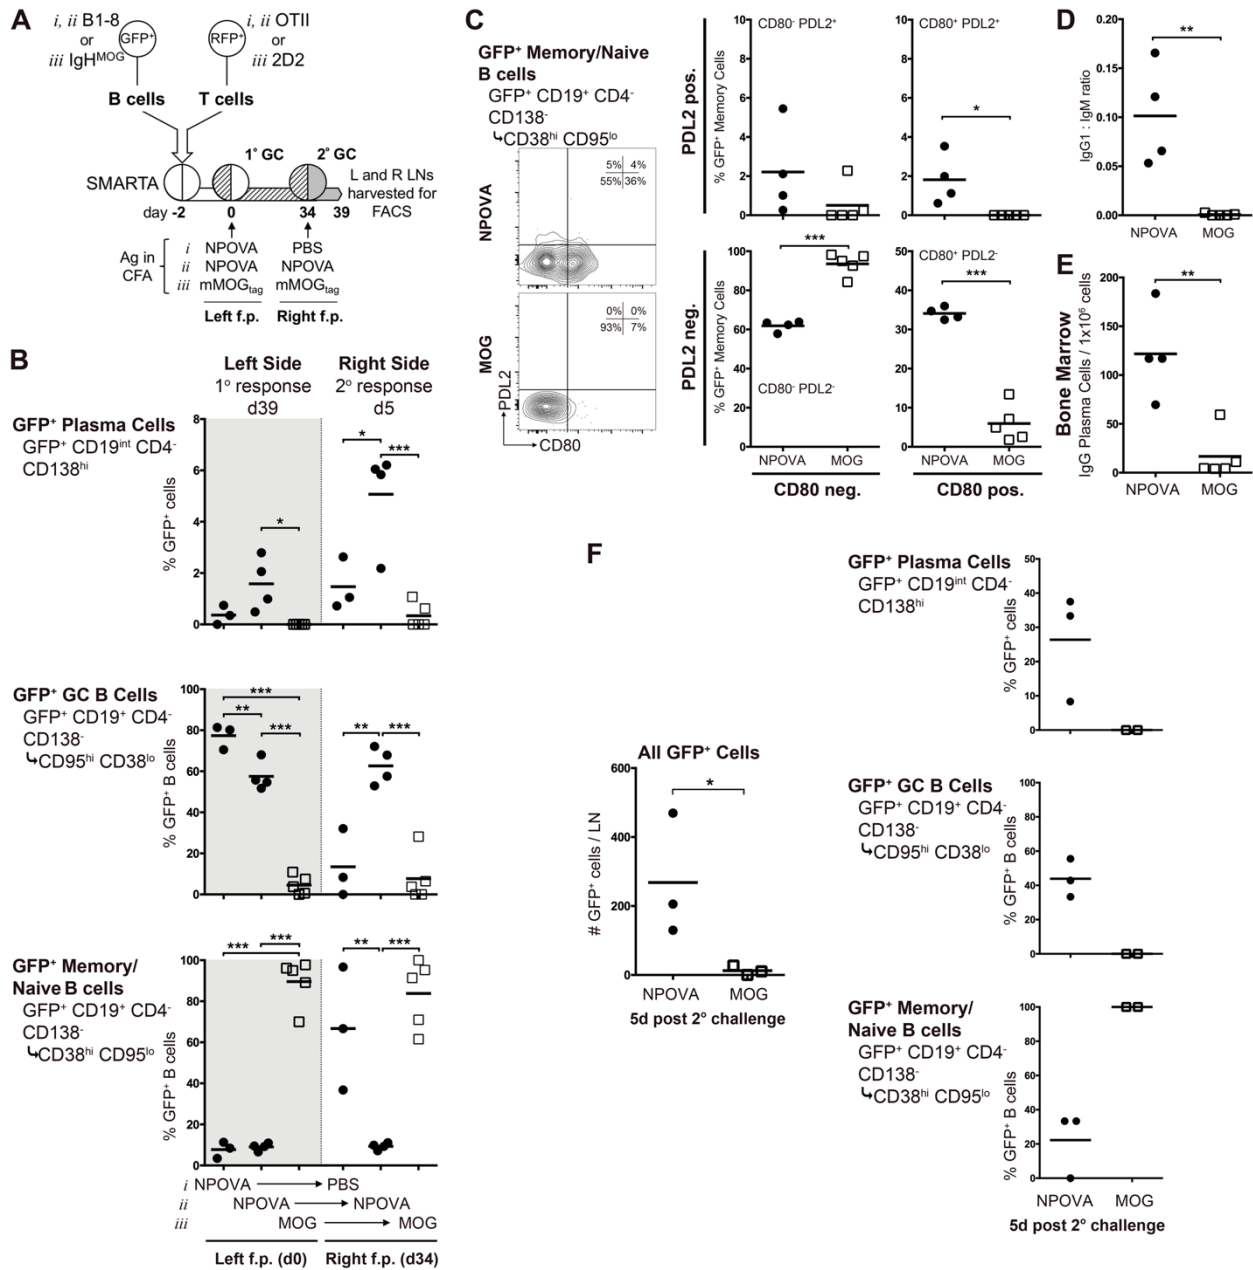

817

818

819 **Figure 6: Memory B cells produced by the MOG GC response are unresponsive to**  
 820 **secondary challenge.** (A) Fluorescent antigen-specific B and T cells were transferred into non-  
 821 fluorescent SMARTA recipients that were then immunized in their left footpad with either  
 822 NPOVA or mMOG<sub>tag</sub> in CFA. Thirty-four days post-immunization, mice were immunized in  
 823 their right footpad with NPOVA, PBS, or mMOG<sub>tag</sub> in CFA in the right footpad, as shown. (B)

824 The primary response in the left draining popliteal and inguinal lymph nodes and secondary  
825 response in the right lymph nodes were analyzed separately by FACS 5d post challenge. The size  
826 of the given antigen-specific subsets as a percentage of the total GFP<sup>+</sup> cells (Plasma cells) or  
827 GFP<sup>+</sup> B cells (GC and Memory/Naïve B cells) is shown for the left and right sides separately.  
828 (C) Representative staining and quantification for CD80 and PD-L2 on NPOVA and MOG GFP<sup>+</sup>  
829 memory/naïve B cell subsets. (D) The ratio of IgG1 expressing cells over IgM expressing cells  
830 amongst GFP<sup>+</sup> memory/naïve B cells is shown. (E) At the same time, bone marrow was  
831 harvested for ELISpot quantification of NP- or MOG-specific IgG producing plasma cells. (F)  
832 Fluorescent antigen-specific B and T cells were transferred into non-fluorescent SMARTA  
833 recipients that were then immunized with NPOVA or mMOG<sub>tag</sub> in CFA. Draining popliteal and  
834 inguinal lymph nodes were harvested 10d post immunization and CD19<sup>+</sup> CD4<sup>-</sup> CD138<sup>-</sup> CD38<sup>hi</sup>  
835 CD95<sup>lo</sup> GFP<sup>+</sup> memory/naïve B cells were sorted. 7.5 x 10<sup>3</sup> cells were transferred along with 5 x  
836 10<sup>5</sup> naïve T cells specific for the appropriate antigen into new non-fluorescent SMARTA  
837 recipient mice. These were immunized with NPOVA or mMOG<sub>tag</sub> and 5d later draining popliteal  
838 and inguinal lymph nodes were analyzed by flow cytometry. The absolute number of GFP<sup>+</sup> cells  
839 per lymph node is shown (left) and then broken down by subset on the right. Each data point  
840 represents an individual mouse. \* p<0.05, \*\*p<0.01, \*\*\*p<0.001.

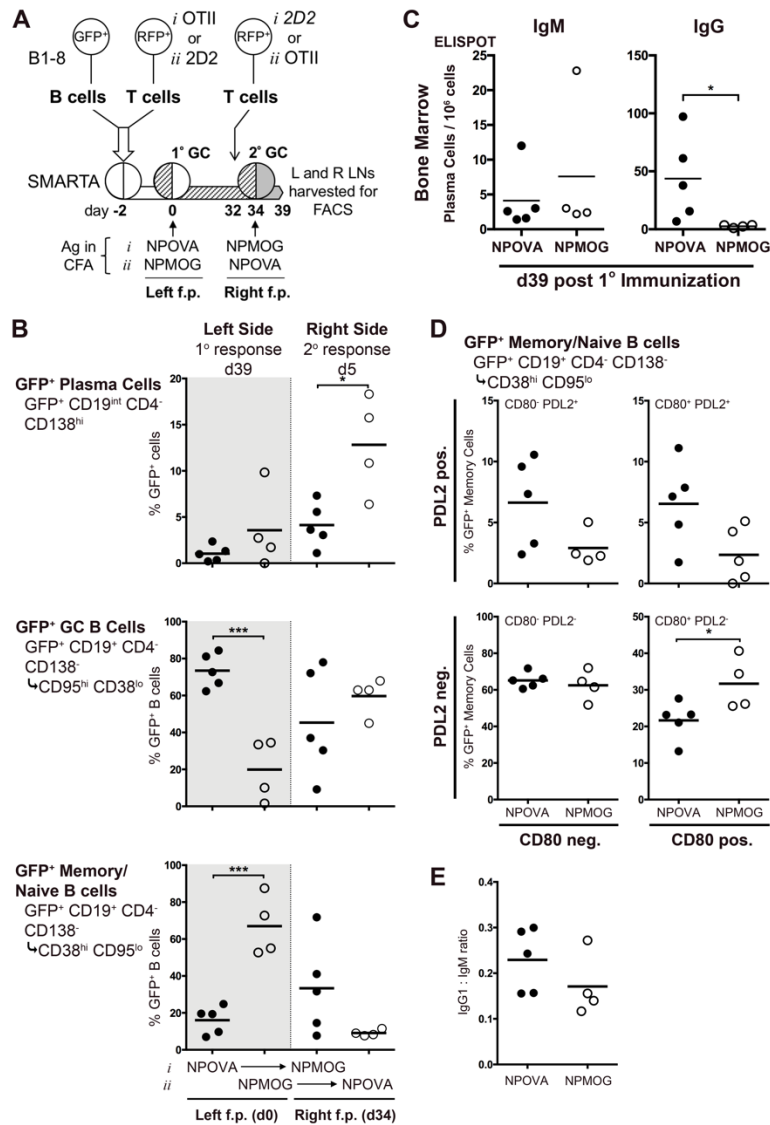

841

842

843 **Figure 7: Autoimmune T cells do not induce unresponsiveness in MOG-specific B cells**

844 **during the GC response. (A)** Fluorescent NP-specific B cells and OVA or MOG-specific T

845 cells were transferred into non-fluorescent SMARTA recipients that were then immunized in

846 their left footpad with either NPOVA or NPMOG. Thirty-two days post-immunization, naïve T

847 cells of the reciprocal specificity were transferred to these recipient mice, as shown, followed

848 two days later by immunization with that antigen in the right footpad. **(B)** The primary response

849 in the left draining popliteal and inguinal lymph nodes and secondary response in the right lymph



850 nodes were analyzed separately by FACS 5d post challenge. The size of the given antigen-  
851 specific subsets as a percentage of the total GFP<sup>+</sup> cells (Plasma cells) or GFP<sup>+</sup> B cells (GC and  
852 Memory/Naïve B cells) is shown for the left and right sides separately. **(C)** At the same time,  
853 bone marrow was harvested for ELISpot quantification of NP-specific IgM or IgG producing  
854 plasma cells (the antigen used to coat plates was based on the primary immunogen). **(D)**  
855 Memory/naïve phenotype GFP<sup>+</sup> B cells were analyzed for expression of CD80 and PD-L2. **(E)**  
856 The ratio of IgG1 over IgM expressing cells amongst GFP<sup>+</sup> memory/naïve B cells is shown.  
857 Each data point represents an individual mouse. \* p<0.05, \*\*p<0.01, \*\*\*p<0.001.
